# Supplementary material for: Cl-capped CdSe nanocrystals via in situ generation of chloride anions
Source: Royal Society of Chemistry journal article supplement (doi:10.1039/c4nr00431k), 2014-01-01
Supplement: c4nr00431k1.pdf [file c4nr00431k1.pdf]

ARTICLE

Supporting Information

**Cl-capped CdSe nanocrystals via in-situ generation of chloride anions**

Cristina Palencia,<sup>a, \*, #</sup> Koen Lauwaet<sup>a</sup>, Leonor de la Cueva<sup>a</sup>, María Acebrón,<sup>a</sup> Julio J. Conde,<sup>a</sup> Michaela Meyns,<sup>b</sup> Christian Klinke,<sup>b</sup> José M. Gallego,<sup>a, c</sup> Roberto Otero<sup>a, d</sup> and Beatriz H. Juárez<sup>a, e, #</sup>

| Cd/Se precursors molar ratio         | 4    | 2    | 1    | 0.5  | 0.25 |
|--------------------------------------|------|------|------|------|------|
| DCE · 10 <sup>-4</sup> (mol)         | 2.5  | 0.75 | 0.38 | 0.38 | 0.38 |
| CdO · 10 <sup>-4</sup> (mol)         | 7.8  | 3.9  | 2    | 2    | 2    |
| ODPA · 10 <sup>-4</sup> (mol)        | 24   | 12   | 6    | 6    | 6    |
| Se@TOP · 10 <sup>-4</sup> (1M) (mol) | 2    | 2    | 2    | 4.3  | 8    |
| DCE/CdO (mol)                        | 0.32 | 0.19 | 0.19 | 0.19 | 0.19 |
| DCE/Se@TOP (mol)                     | 1.25 | 0.38 | 0.19 | 0.09 | 0.05 |
| DCE/TOP (mol)                        | 0.62 | 0.19 | 0.12 | 0.06 | 0.03 |

**Table S1** Molar amounts of precursors used to prepare CdSe NCs from different Cd/Se precursor molar ratios. DCE/CdO and DCE/Se@TOP and DCE/TOP molar ratios are also included.

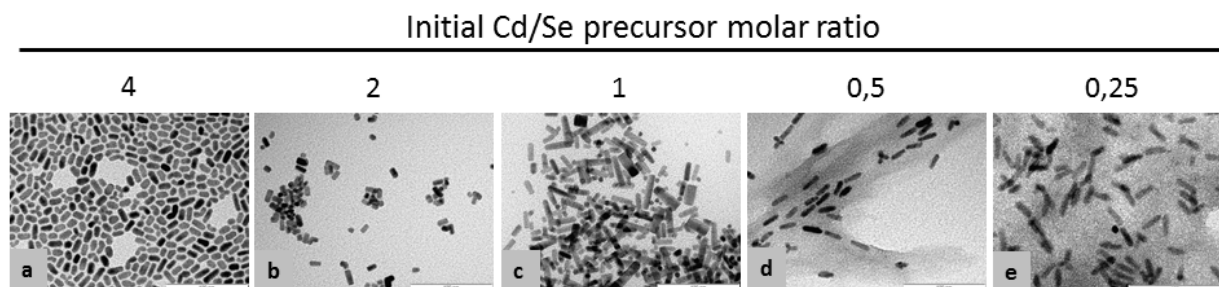

**Figure S2** Control experiments: TEM images the CdSe NCs obtained from Cd/Se precursor molar ratios of 4, 2, 1, 0.5 and 0.25 in the absence of DCE.

**Chlorine incorporation in two-steps.** Control experiments were carried out by mixing the starting CdSe rods with (a) TOPO, (b) TOP/TOPO, (c) Se@TOP/TOPO and with (e) DCE/TOPO. In all the cases, the volume of TOP or Se@TOP 1M injected was 0.4 mL. All reactions have been done under nitrogen.

|                                 | pyramids |      |      | rods |      |
|---------------------------------|----------|------|------|------|------|
| Initial Cd/Se                   | 0.25     | 0.5  | 1    | 2    | 4    |
| Normalized areas from XPS peaks |          |      |      |      |      |
| Se/Cd                           | 0.38     | 0.38 | 0.40 | 0.31 | 0.41 |
| P/Cd                            | 2.23     | 2.26 | 2.32 | 2.35 | 2.47 |
| Cl/Cd                           | 0.22     | 0.16 | 0.17 | 0.07 | 0.08 |
| Cl/P                            | 0.10     | 0.07 | 0.07 | 0.03 | 0.03 |

**Table S3** Se/Cd, P/Cd, Cl/Cd and Cl/P relative XPS peak areas of CdSe samples synthesized from different Cd/Se precursor molar ratios. The experimental error associated to the relative XPS peak areas is 10%.

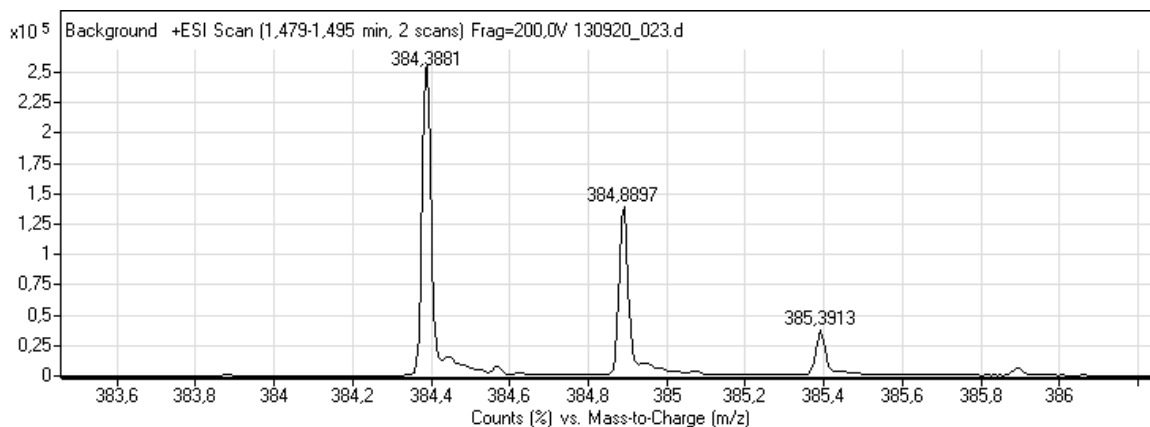

**Figure S3** MS spectrum of the product DCE+TOP at 265°C.
